# Supplementary material for: Comparing visual and acoustic detectability of two coastal cetacean species off Sindhudurg, India, to better inform integrated survey protocol.
Source: Research Square preprint supplement (doi:10.21203/rs.3.rs-5009591/v1), 2024-10-16
Supplement: Supplementary file 1 [file 07dddd182049f749db1fe859.pdf]

## Supplementary information

Equation of the global model for fitting the GAMM.

Humpback dolphin encounter rate model

$$\begin{aligned} GlobalModel \leftarrow & \text{gam}(\text{encounters} \sim s(\text{dist}, k = 5, \text{by} = \text{detection}) + \\ & s(\text{depth}, k = 5, \text{by} = \text{detection}) \\ & + s(\text{timeenc}, k = 5, \text{by} = \text{detection}) + s(\text{boats}, k = 5, \text{by} = \text{detection}) \\ & + te(\text{swell}, \text{sea state}, k = 3, \text{by} = \text{detection}) + \text{detection} + s(\text{lineID}, \text{bs} = "re") + \\ & \text{offset}(\log(\text{lineseg})), \text{family} = \text{tw}(), \text{method} = "REML", \text{data} = \text{dolphin}) \end{aligned}$$

Finless porpoise encounter rate model

$$\begin{aligned} GlobalModel \leftarrow & \text{gam}(\text{encounters} \sim s(\text{dist}, k = 4, \text{by} = \text{detection}) + \\ & s(\text{depth}, k = 4, \text{by} = \text{detection}) \\ & + s(\text{timeenc}, k = 4, \text{by} = \text{detection}) + s(\text{boats}, k = 4, \text{by} = \text{detection}) \\ & + te(\text{swell}, \text{sea state}, k = 4, \text{by} = \text{detection}) + \text{detection} + s(\text{lineID}, \text{bs} = "re") + \\ & \text{offset}(\log(\text{lineseg})), \text{family} = \text{tw}(), \text{method} = "REML", \text{data} = \text{porpoise}) \end{aligned}$$

**Table 1.** Final GAMM Model

| Species          | Predictors                                                                                        | Dev.explained | Residual df | AIC |
|------------------|---------------------------------------------------------------------------------------------------|---------------|-------------|-----|
| Humpback dolphin | $s(\text{boats}, k = 5) + s(\text{distance}, k = 5) + te(\text{swell} + \text{sea state}, k = 3)$ | 14.60%        | 27          | 362 |
| Finless porpoise | $s(\text{depth}, k = 5) + s(\text{distance}, k = 5) + te(\text{swell} + \text{sea state}, k = 5)$ | 17.4%         | 23          | 546 |

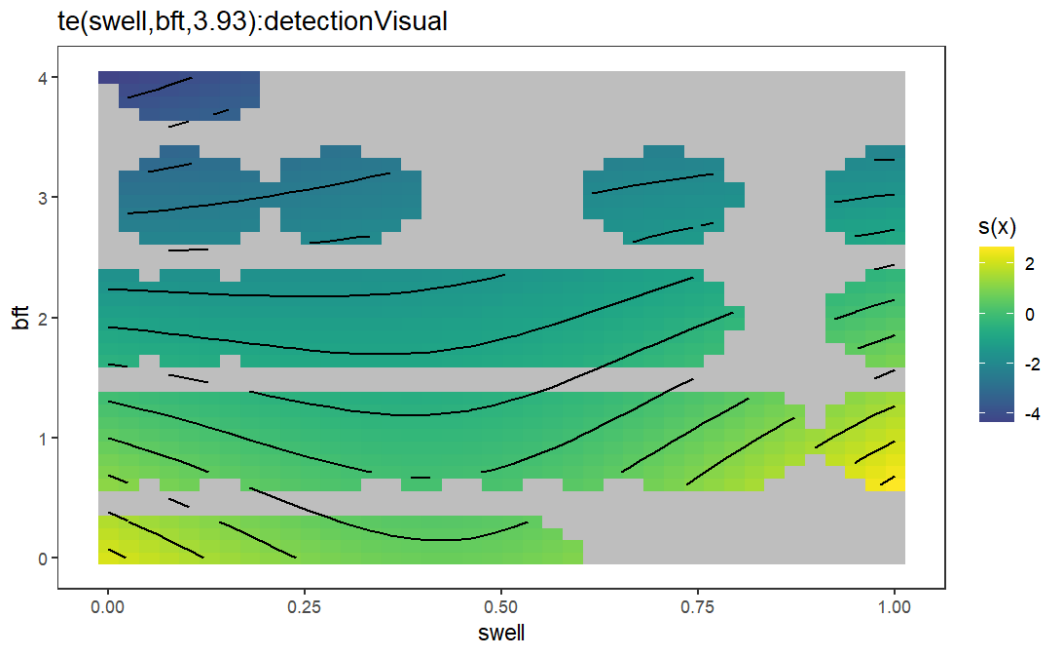

**Figure 1.** S1.Tensor product interaction of effect of sea swell and sea state on visual detections of humpback dolphins

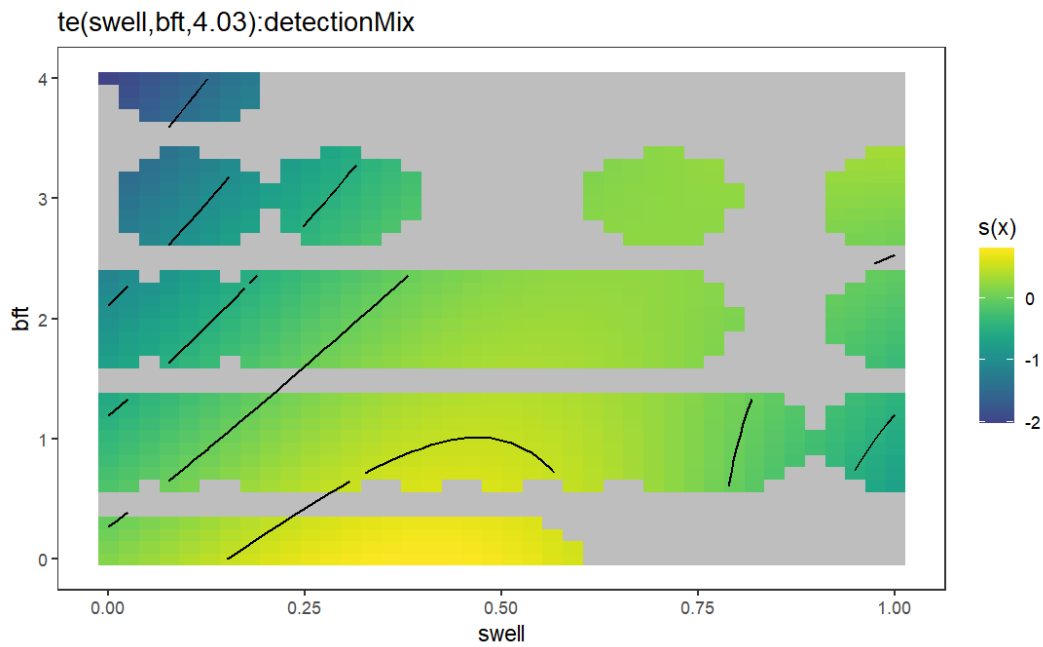

**Figure 2.** S2.Tensor product interaction of effect of sea swell and sea state on mixed detection of humpback dolphins

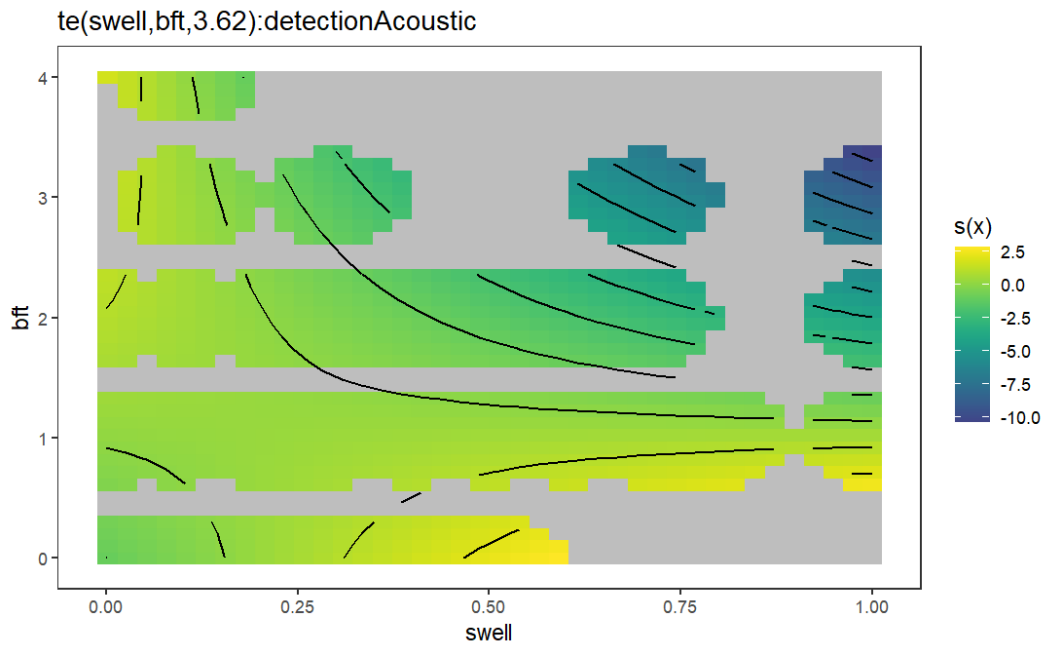

**Figure 3.** S3.Tensor product interaction of effect of sea swell and sea state on acoustic detections of humpback dolphins

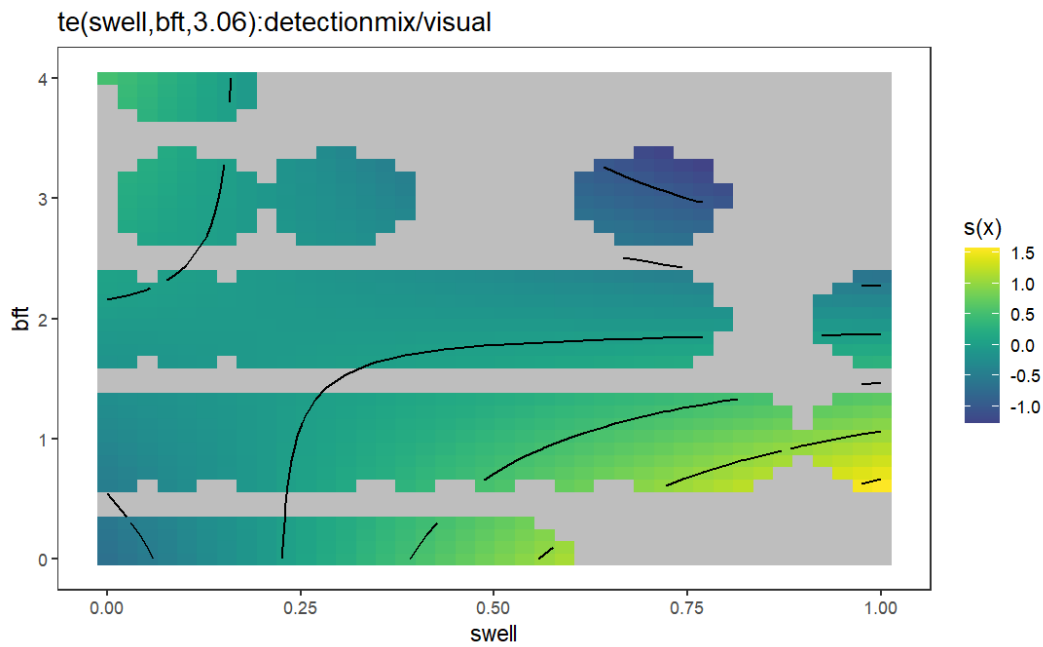

**Figure 4.** S4.Tensor product interaction of effect of sea swell and sea state on mix/visual detections of finless porpoises

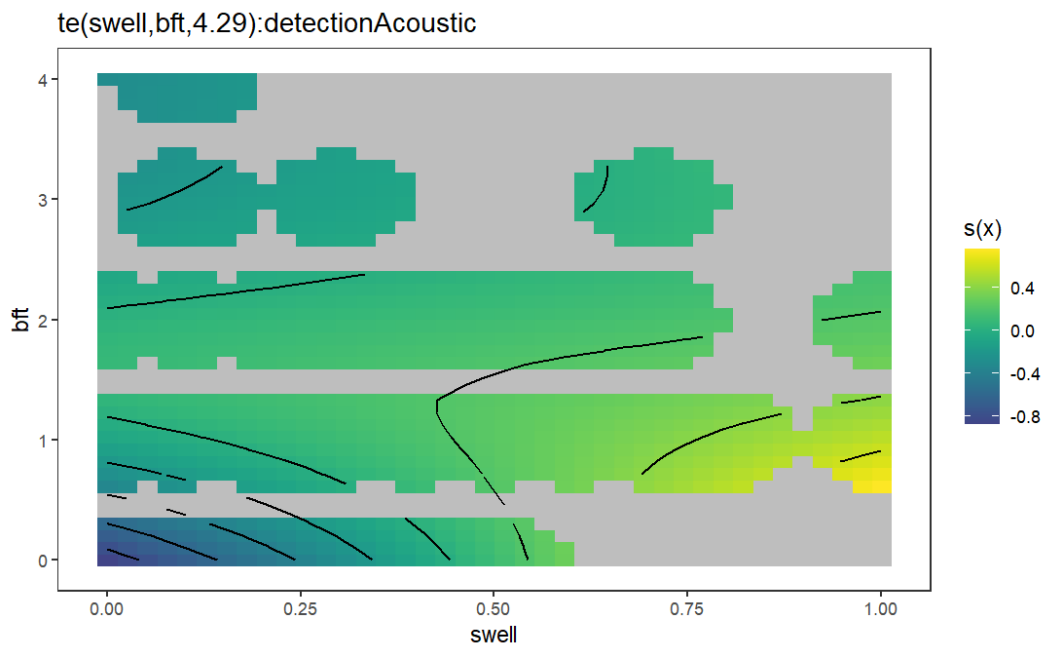

**Figure 5.** S5.Tensor product interaction of effect of sea swell and sea state on acoustic detections of finless porpoises

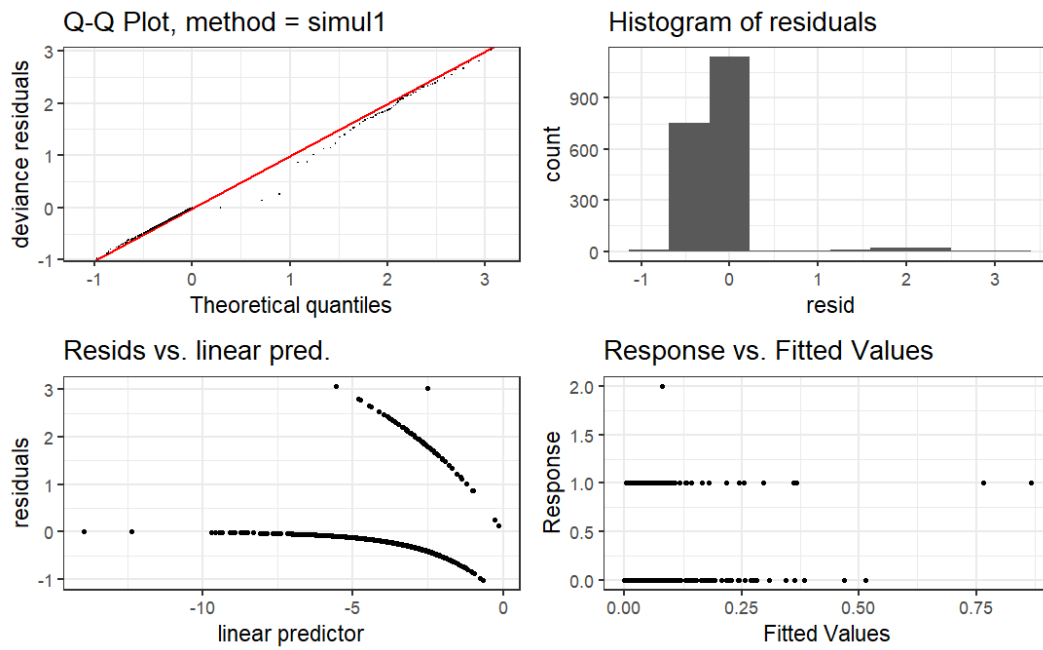

**Figure 6.** S6.Diagnostic plots of the final GAMM model for humpback dolphin encounter rates

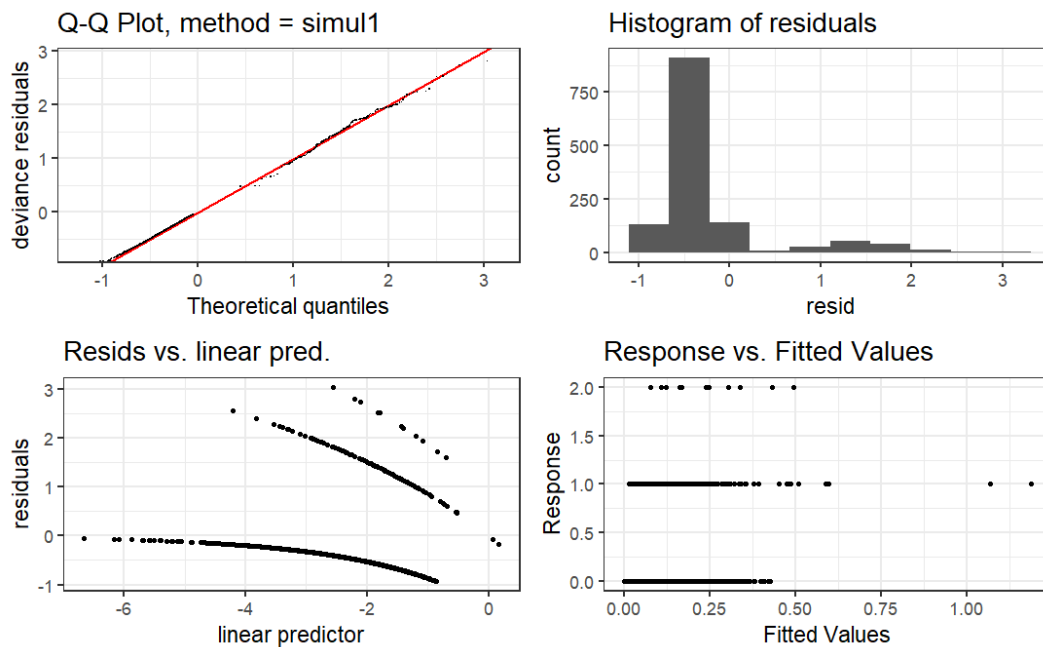

**Figure 7.** S7.Diagnostic plots of the final GAMM model for finless porpoise encounter rates
